# Supplementary material for: The preparation of organophosphorus ligand-modified SBA-15 for effective adsorption of Congo red and Reactive red 2
Source: Royal Society of Chemistry journal article supplement (doi:10.1039/c9ra02287b), 2019-01-01
Supplement: c9ra02287b1.pdf [file c9ra02287b1.pdf]

*Supplementary Information of*

**Preparation of organophosphorus modified SBA-15 for effective  
adsorption of Congo red and Reactive red 2**

Fan Zhang <sup>a, b</sup>, Chuting Yang <sup>b</sup>, Yi Li <sup>b</sup>, Min Chen <sup>a, c</sup>, Sheng Hu <sup>b</sup>, Haiming Cheng <sup>\*a, c</sup>

*a. National Engineering Laboratory for Clean Technology of Leather Manufacture,*

*Sichuan University, Chengdu 610065, Sichuan, China*

*b. Institute of Nuclear Physics and Chemistry, China Academy of Engineering physics,*

*Mianyang 621900, Sichuan, China*

*c. The Key Laboratory of Leather Chemistry and Engineering of Ministry of*

*Education, Sichuan University, Chengdu 610065, China*

**Table of Contents**

|                                                                                             |    |
|---------------------------------------------------------------------------------------------|----|
| <b>Nomenclature</b> .....                                                                   | 2  |
| <b>APTES-BOP Ligand analysis</b> .....                                                      | 3  |
| <b>Fig. S1.</b> The chemical structures of APTES-BOP ligand .....                           | 3  |
| <b>Fig. S2.</b> NMR spectra .....                                                           | 4  |
| <b>Fig. S3.</b> Solid state <sup>31</sup> P CP-MAS NMR spectra .....                        | 5  |
| <b>Fig. S4.</b> The absorption spectrogram .....                                            | 6  |
| <b>Fig. S5.</b> Isotherms models.....                                                       | 7  |
| <b>Fig. S6.</b> The plot of $R_L$ versus $C_e$ . .....                                      | 7  |
| <b>Fig. S7.</b> Kinetics models .....                                                       | 8  |
| <b>Fig. S8.</b> Thermodynamic study .....                                                   | 9  |
| <b>Fig. S9.</b> FTIR spectra of SBA-15-BOP before and after adsorbing both dyes. ....       | 10 |
| <b>Table S1</b> Molecular structure and properties of the investigated dyes.....            | 5  |
| <b>Table S2</b> Typical adsorption isotherms, kinetics models and thermodynamic equations.. | 6  |
| <b>Table S3</b> Isotherm parameters .....                                                   | 7  |

|                                                                 |   |
|-----------------------------------------------------------------|---|
| <b>Table S4</b> Kinetic parameters .....                        | 8 |
| <b>Table S5</b> Intra-particle diffusion model parameters ..... | 9 |
| <b>Table S6</b> Thermodynamic parameters .....                  | 9 |

| <b>Nomenclature</b> |                                                                                                                                   |
|---------------------|-----------------------------------------------------------------------------------------------------------------------------------|
| $C_0$               | Initial dye concentration of solution (mg/L)                                                                                      |
| $C_e$               | Equilibrium concentration of the dye in solution (mg/L)                                                                           |
| $R$                 | Dye removal percentage (%)                                                                                                        |
| $m$                 | Adsorbent weight (mg)                                                                                                             |
| $V$                 | Volume of solutions (mL)                                                                                                          |
| $q_e$               | Amount of dye adsorbed at equilibrium                                                                                             |
| $q_t$               | Amount of dye adsorbed at time t                                                                                                  |
| $q_m$               | The maximum adsorption capacity for monolayer adsorption (mg/g)                                                                   |
| $K_L$               | Langmuir constant (L/mg)                                                                                                          |
| $K_F$               | Freundlich isotherm constant related to adsorption capacity                                                                       |
| $K_T$               | The maximum binding energy constant (L/mg)                                                                                        |
| $B_T$               | Temkin constant related to the heat of adsorption                                                                                 |
| $n$                 | Freundlich isotherm constant related to adsorption intensity                                                                      |
| $R^2$               | Linear correlation coefficient                                                                                                    |
| $R_L$               | Dimensionless constant separation factor                                                                                          |
| $k_1$               | Pseudo-first order rate constant ( $\text{min}^{-1}$ )                                                                            |
| $k_2$               | Pseudo-second order rate constant ( $\text{g/mg}\cdot\text{min}$ )                                                                |
| $k_{id}$            | Intra-particle diffusion rate constant ( $\text{mg/g}\cdot\text{min}^{1/2}$ )                                                     |
| $t$                 | Contact time (min)                                                                                                                |
| $C_i$               | Intercept related to the thickness of the boundary layer                                                                          |
| $\alpha$            | Initial sorption rate in the Elovich model ( $\text{mg/g}\cdot\text{min}$ )                                                       |
| $\beta$             | Constant related to the extent of surface coverage and activation energy for chemisorption in the Elovich model ( $\text{g/mg}$ ) |
| $\Delta G^\circ$    | Gibbs free energy (kJ/mol)                                                                                                        |
| $\Delta H^\circ$    | Enthalpy (kJ/mol)                                                                                                                 |
| $\Delta S^\circ$    | Entropy (J/mol·K)                                                                                                                 |
| $K_d$               | Distribution coefficient (mL/g)                                                                                                   |
| $R$                 | Ideal gas constant ( $8.314 \text{ J/mol}\cdot\text{K}$ )                                                                         |
| $T$                 | Absolute temperature (K)                                                                                                          |

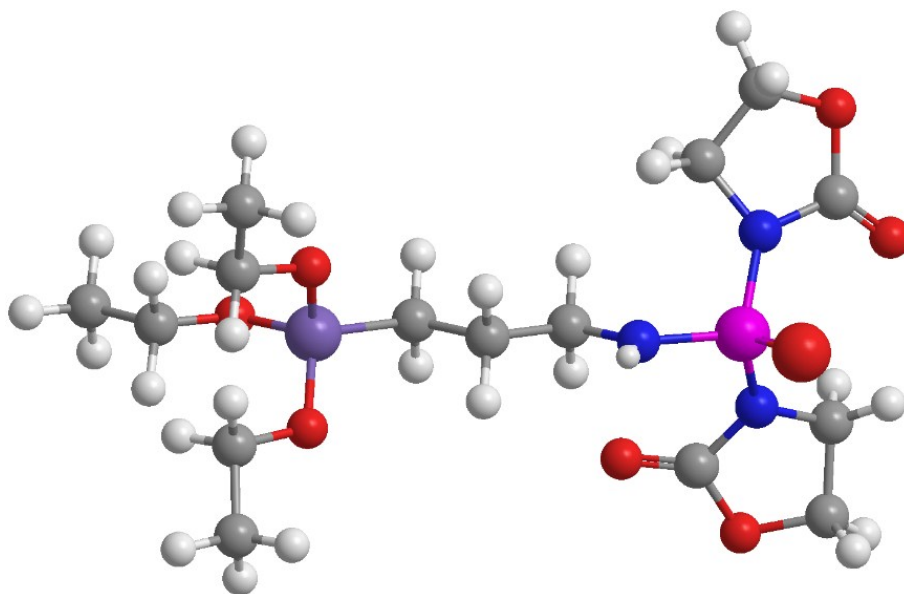

**Fig. S1.** The chemical structure of APTES-BOP ligand.

**APTES-BOP Ligand analysis:**

P,P-bis(2-oxooxazolidin-3-yl)-N-(3-(triethoxysilyl)propyl)phosphinic amide.

$^1\text{H}$  NMR (600 MHz,  $\text{CDCl}_3$ )  $\delta$  4.47 – 4.31 (m, 4H), 4.17 (dd,  $J = 16.5, 7.1$  Hz, 1H), 4.03 (td,  $J = 8.9, 1.0$  Hz, 2H), 3.91 (td,  $J = 9.0, 6.8$  Hz, 2H), 3.72 (dq,  $J = 69.0, 7.0$  Hz, 6H), 3.07 (dq,  $J = 14.1, 7.0$  Hz, 2H), 1.67 – 1.55 (m, 2H), 1.19 (dt,  $J = 10.7, 5.8$  Hz, 9H), 0.68 – 0.51 (m, 2H).

$^{13}\text{C}$  NMR (151 MHz,  $\text{CDCl}_3$ )  $\delta$  156.6 (d,  $J = 9.4$  Hz), 63.9 (d,  $J = 8.6$  Hz), 58.4 (d,  $J = 19.8$  Hz), 44.5 (d,  $J = 4.0$  Hz), 42.9, 29.7, 18.4 (d,  $J = 17.8$  Hz), 7.47. HRMS calcd for  $\text{C}_{15}\text{H}_{30}\text{N}_3\text{O}_8\text{PSi}$  ( $\text{M}^+$ ): 439.1540; found: 439.1542.

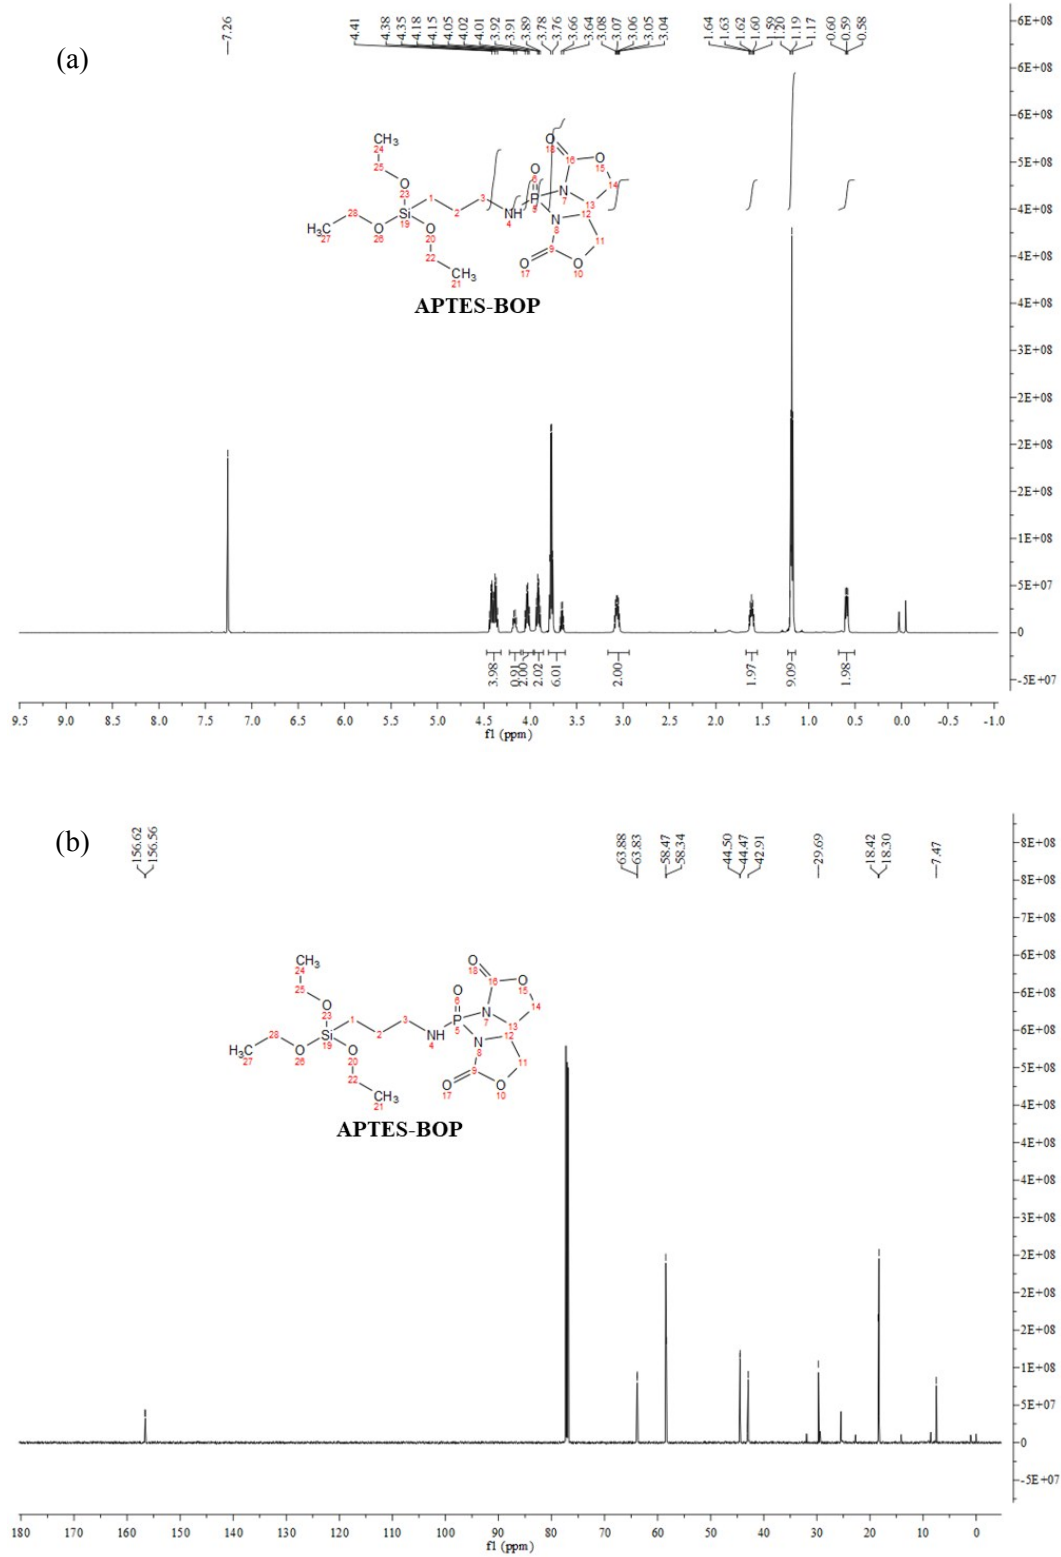

**Fig. S2.** (a) the  $^1\text{H}$  NMR and (b)  $^{13}\text{C}$  NMR spectra of APTES-BOP.

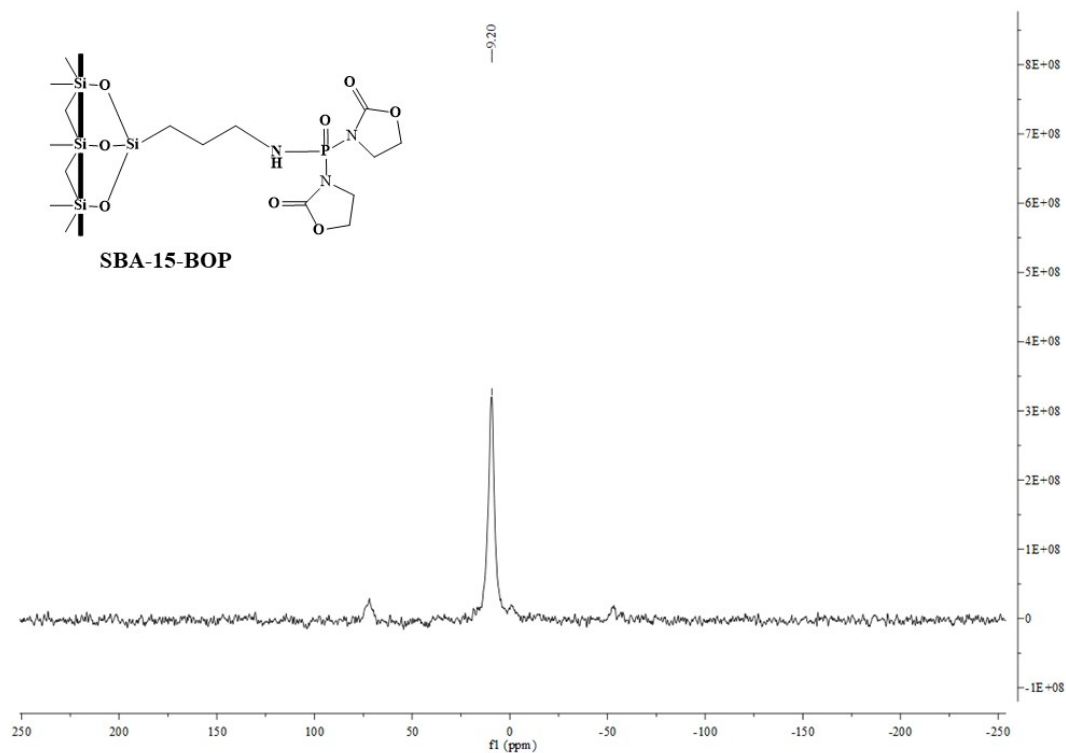

**Fig. S3.** Solid state  $^{31}\text{P}$  CP-MAS NMR spectra of SBA-15-BOP.

**Table S1** Molecular structure and properties of the investigated dyes

| Characteristic           | CR                                                                                  | RR2                                                                                   |
|--------------------------|-------------------------------------------------------------------------------------|---------------------------------------------------------------------------------------|
| Molecular Formula        | $\text{C}_{32}\text{H}_{22}\text{N}_6\text{Na}_2\text{O}_6\text{S}_2$               | $\text{C}_{19}\text{H}_{10}\text{Cl}_2\text{N}_6\text{Na}_2\text{O}_7\text{S}_2$      |
| Commercial Name          | Congo Red                                                                           | Reactive Red 2                                                                        |
| Color Index NO.          | C.I. Direct Red 28                                                                  | C.I. Reactive Red 2                                                                   |
| Class                    | Direct Dye                                                                          | Reactive Dye                                                                          |
| Molecular Weight (g/mol) | 696.66                                                                              | 615.33                                                                                |
| $\lambda_{\text{max}}$   | 498nm                                                                               | 539nm                                                                                 |
| Molecular Structure      | 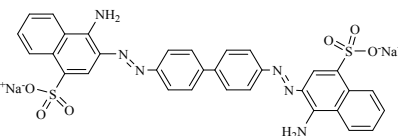 |  |

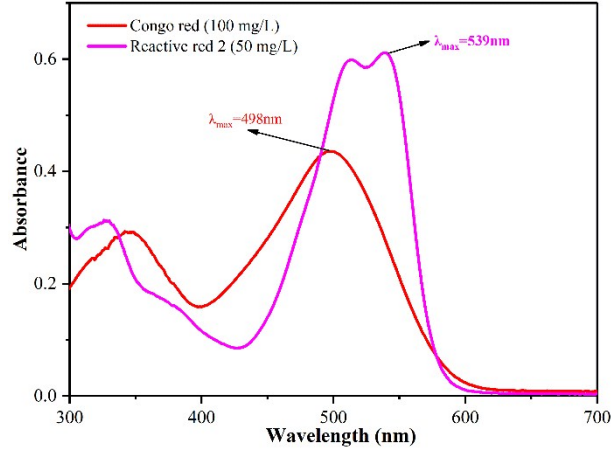

**Fig. S4.** The absorption spectrogram of CR and RR2. ( at natural pH conditions;  $T = 25\text{ }^{\circ}\text{C}$ )

**Table S2** Typical adsorption isotherms, kinetics models and thermodynamic equations have been investigated in the present work<sup>[1-3]</sup>.

| Model                          | Equation                                                     |
|--------------------------------|--------------------------------------------------------------|
|                                | $C_e / q_e = 1 / K_L q_m + C_e / q_m$                        |
| Langmuir isotherm              | $R_L = \frac{1}{(1 + K_L C_0)}$                              |
| Freundlich isotherm            | $\ln q_e = \ln K_F + \ln C_e / n$                            |
| Temkin isotherm                | $q_e = B_T \ln K_T + B_T \ln C_e$                            |
| Pseudo-first-order model       | $1 / q_t = 1 / (q_e t) + 1 / q_e$                            |
| Pseudo-second-order model      | $t / q_t = 1 / (k_2 q_e^2) + t / q_e$                        |
| Simple Elovich model           | $q_t = \frac{\ln \alpha \beta}{\beta} + \frac{\ln t}{\beta}$ |
| Intra-particle diffusion model | $q_t = k_{id} t^{1/2} + C_i$                                 |
|                                | $K_d = \frac{C_0 - C_e}{C_e} \times \frac{V}{m}$             |
| Thermodynamic study            | $\Delta G^{\circ} = \Delta H^{\circ} - T \Delta S^{\circ}$   |
|                                | $\ln K_d = \Delta S^{\circ} / R - \Delta H^{\circ} / RT$     |

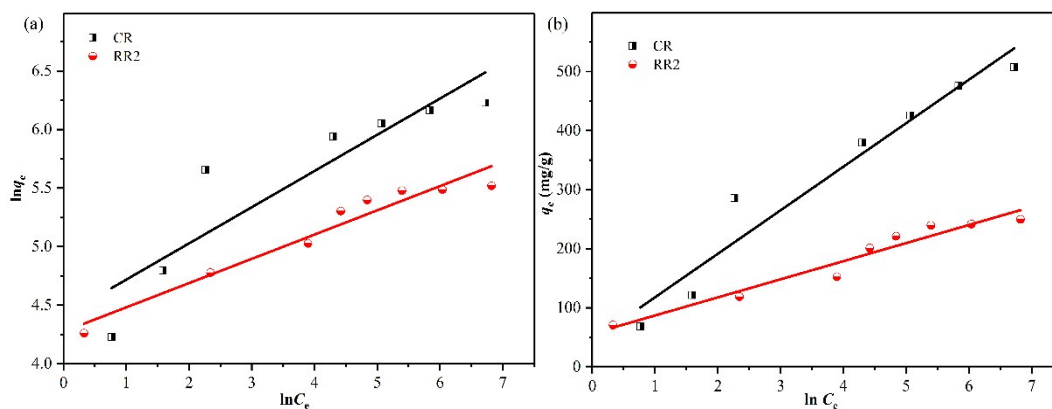

**Fig. S5.** The isotherms of (a) Freundlich and (b) Temkin models for dye adsorption onto SBA-15-BOP.

**Table S3** Isotherm parameters for CR and RR2 adsorption on SBA-15-BOP

| Isotherms  | Parameters   | CR      | RR2     |
|------------|--------------|---------|---------|
| Langmuir   | $K_L$ (L/mg) | 0.04467 | 0.05786 |
|            | $q_m$ (mg/g) | 518.1   | 253.8   |
|            | $R^2$        | 0.9984  | 0.9991  |
| Freundlich | $K_F$ (L/mg) | 82.17   | 71.82   |
|            | $n$          | 3.234   | 4.829   |
|            | $R^2$        | 0.7984  | 0.9374  |
| Temkin     | $K_T$ (L/mg) | 5.308   | 1.724   |
|            | $B_T$        | 73.67   | 30.65   |
|            | $R^2$        | 0.9350  | 0.9400  |

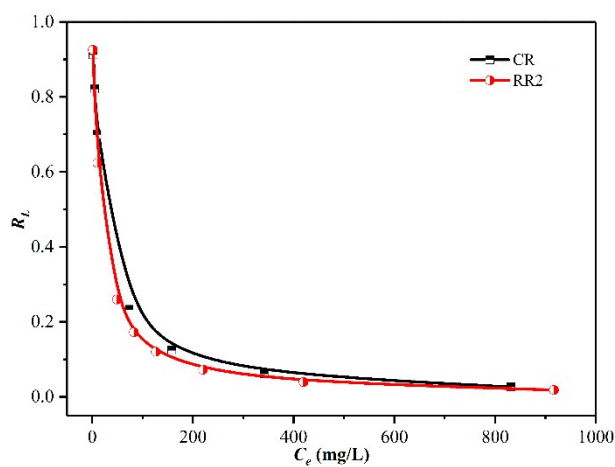

**Fig. S6.** The plot of  $R_L$  versus  $C_e$ .

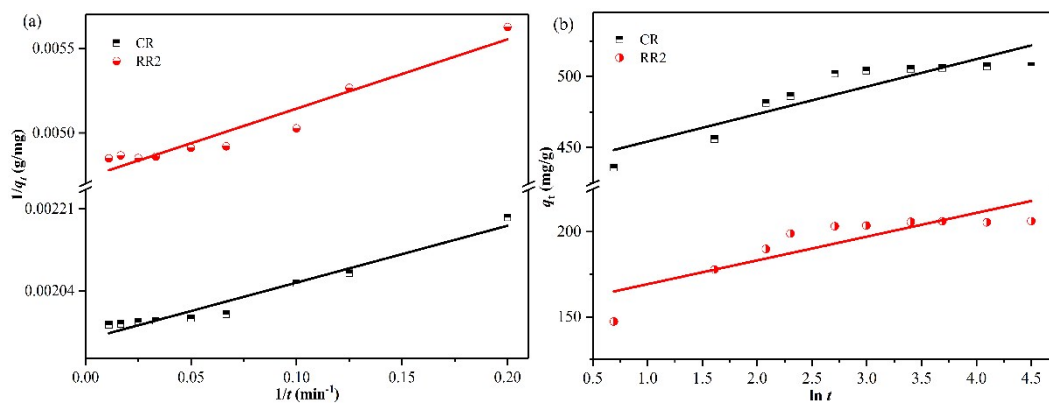

**Fig. S7.** (a) pseudo-first-order and (b) Elovich models for dye adsorption onto SBA-15-BOP.

**Table S4** Kinetic parameters for CR and RR2 adsorption on SBA-15-BOP

| Kinetic model       | Parameters                 | CR       | RR2      |
|---------------------|----------------------------|----------|----------|
| Pseudo-first-order  | $q_t$ (mg/g)               | 496.0    | 201.7    |
|                     | $k_1$ (min <sup>-1</sup> ) | 1.020    | 0.5952   |
|                     | $R^2$                      | 0.9889   | 0.9876   |
| Pseudo-second-order | $q_t$ (mg/g)               | 507.6    | 206.6    |
|                     | $k_2$ (g/mg·min)           | 0.009164 | 0.01845  |
|                     | $R^2$                      | 0.9999   | 0.9999   |
| Elovich             | $\alpha$ (mg/g·min)        | 1.12E+11 | 9.54E+05 |
|                     | $\beta$ (g/mg)             | 0.0517   | 0.0717   |
|                     | $R^2$                      | 0.8065   | 0.7146   |



**Table S5** Intra-particle diffusion model parameters for CR and RR2 adsorption on SBA-15-BOP

| Dye | $C_0$ (mg/L) | $k_{1d}$ (mg/g·min <sup>1/2</sup> ) | $k_{2d}$ (mg/g·min <sup>1/2</sup> ) | $k_{3d}$ (mg/g·min <sup>1/2</sup> ) | $C_1$ | $C_2$ | $C_3$ | $(R_1)^2$ | $(R_2)^2$ | $(R_3)^2$ |
|-----|--------------|-------------------------------------|-------------------------------------|-------------------------------------|-------|-------|-------|-----------|-----------|-----------|
| CR  | 200          | 308.2                               | 27.88                               | 0.9096                              | 0     | 397.0 | 499.8 | 1         | 0.9747    | 0.8172    |
| RR2 | 200          | 111.2                               | 19.22                               | 0.5780                              | 0     | 132.5 | 201.3 | 1         | 0.9399    | 0.8075    |

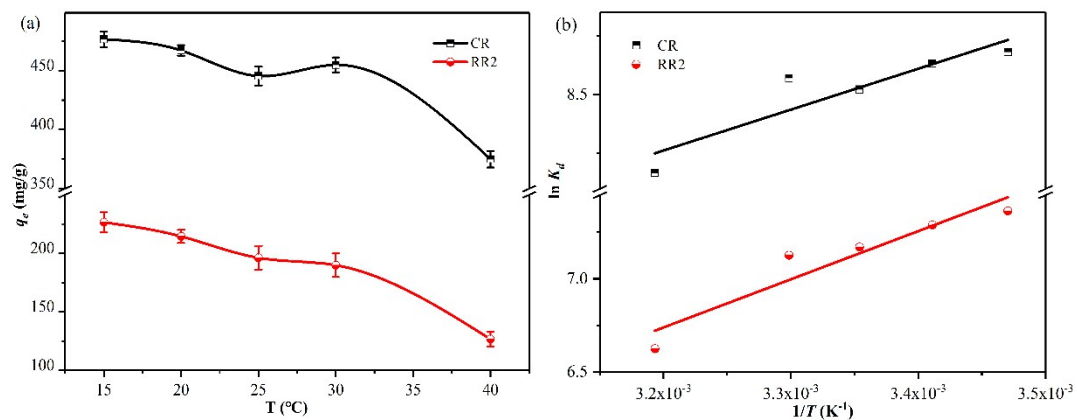

**Fig. S8.** (a) effect of contact time on the adsorption; (b) the plot of  $\ln K_d$  versus  $1/T$ .  
(dyes concentration = 200 mg/L,  $V/m = 3$  mL/mg,  $t = 60$  min)

**Table S6** Thermodynamic parameters for CR and RR2 adsorption on SBA-15-BOP

| Dye | $\Delta H^0$ (kJ/mol) | $\Delta S^0$ (J/mol·K) | $\Delta G^0$ (kJ/mol) |        |        |        |        |
|-----|-----------------------|------------------------|-----------------------|--------|--------|--------|--------|
|     |                       |                        | 288 K                 | 293 K  | 298 K  | 303 K  | 313 K  |
| CR  | -14.43                | 22.52                  | -20.92                | -21.03 | -21.14 | -21.26 | -21.48 |
| RR2 | -21.53                | -12.87                 | -17.82                | -17.76 | -17.69 | -17.63 | -17.50 |

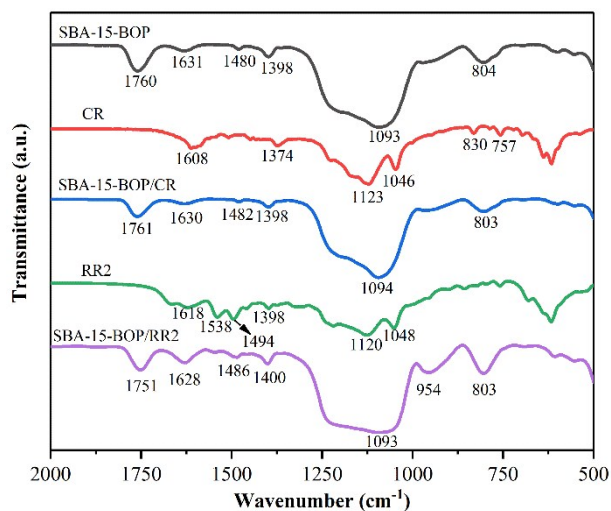

**Fig. S9.** FT-IR spectra of SBA-15-BOP before and after adsorbing both dyes.

## References

- [1] Z. Wu, H. Zhong, X. Yuan, H. Wang, L. Wang, X. Chen, G. Zeng, Y. Wu, Adsorptive removal of methylene blue by rhamnolipid-functionalized graphene oxide from wastewater, *Water Res*, 67 (2014) 330-344.
- [2] F. Zhang, M. Chen, S. Hu, H. Cheng, Chemical treatments on the cuticle layer enhancing the uranium(VI) uptake from aqueous solution by amidoximated wool fibers, *Journal of Radioanalytical and Nuclear Chemistry*, 314 (2017) 1927-1937.
- [3] L. Largitte, R. Pasquier, A review of the kinetics adsorption models and their application to the adsorption of lead by an activated carbon, *Chemical Engineering Research and Design*, 109 (2016) 495-504.
